# Supplementary material
Source: PubMed Central journal article supplement (PMC3798684)
Supplement: d7e245151a6f795018b26b31d3911a5f_tableS1-S2.pdf [file d7e245151a6f795018b26b31d3911a5f_tableS1-S2.pdf]

Table S1. Forward and Reverse Primer Pairs

| Gene           | Forward Primer        | Reverse Primer        |
|----------------|-----------------------|-----------------------|
| <i>NCEH1</i>   | ggtattgccctttcctcctc  | tgaggcccaggaagtgtatc  |
| <i>CKAP2</i>   | ctagccacggatccacctaa  | tgaacaatttggccacgata  |
| <i>ADAMTS1</i> | tgaatggcgacttcactctg  | gaaagtagggatggcggtga  |
| <i>TAGLN</i>   | gagcaagctggtaaatagcc  | aagaggtcaacggctctggaa |
| <i>CSF2</i>    | cctaccacaaagagccaaa   | tattgctgatccctgccagt  |
| <i>VCAM1</i>   | atctctctggaccccagat   | ttttgccacacatcacagt   |
| <i>MCP1</i>    | gctcagccagatgcaattaac | cacttgctgctggtgactct  |
| <i>THBS1</i>   | acacgactgcaacaagaacg  | ggttggggcaattatccttt  |
| <i>BMP4</i>    | accgaatgctgatggctggt  | cagaagtgtggcctcgaagt  |
| <i>WISP2</i>   | ggctgaggatggagactctg  | gaaacgtggccattctccta  |
| <i>CCL26</i>   | cctggaagcaggtgcatagt  | attcagcggtcaggtcacag  |
| <i>TTR</i>     | caagaaggctgctgacgaga  | tgtgaacaccacctctgcaa  |
| <i>CSF1</i>    | tgattgggaacggacacctg  | ctttggcattgggggtgttg  |
| <i>PROCR</i>   | cggcttgctaagaaccaaag  | ggttgcggatgacttgttt   |
| <i>EMR3</i>    | tacgcttccaccatcaccaa  | cagccagactccacagatga  |
| <i>RTP4</i>    | ctacactggggagaggacca  | ggtctgaagctgtgtccctt  |
| <i>DCK</i>     | gcaaccaaagtattccacct  | ggaaccacctaataccagaa  |
| <i>TOP2A</i>   | aatgatgcaggaggccgaaa  | aaccaccaaaggcctgaaa   |
| <i>DHRS3</i>   | gggaggaggtgtaccagaca  | agagagtccaacacggagt   |
| <i>SMC2</i>    | gtagcttgggtgctttcgc   | gtcactagggcagagagtgc  |

|                  |                        |                         |
|------------------|------------------------|-------------------------|
| <i>HSPH1</i>     | gaagccgacatggactgtca   | aggggggagactgtgaggtt    |
| <i>SMC4</i>      | acaacgggtagcagaattgg   | acaaggtccagctcagcatc    |
| <i>CENPF</i>     | ggcaaaaggcaaaggccag    | agcccctctggctcaaattc    |
| <i>GAS2</i>      | aaactaccaagcccaccaag   | ttgtggaggaccaaaccttc    |
| <i>FABP4</i>     | agctgcacttcttttcaccttg | cgcccacttctttcatgtaatca |
| <i>FBXO32</i>    | tggagacacccttcagctct   | catccaatcatcaggggaac    |
| <i>RPRM</i>      | cgacttctgccttcgggat    | cgccctaatgccttctctt     |
| <i>PRUNE2</i>    | cttgagactcccgatgaagc   | aggccatccccatagtatcc    |
| <i>PDLIM4</i>    | tacccagaggacaacaagg    | taaagaagctgcctgccaat    |
| <i>H4</i>        | acaggccaaagttttgtcg    | taaagaagctgcctgccaat    |
| <i>CD14</i>      | cagccgacaaccagagagag   | tagaccagtcaggcttcgga    |
| <i>FABP5</i>     | gatggcaaaaacctcagcat   | ttgtgcttctttccatcc      |
| <i>NOV</i>       | agcctgaacacctacaagcc   | gacgagttgctgtgaggaca    |
| <i>LOC539374</i> | ggagatgggacacttgaggc   | cacaaacaggaaactggccg    |
| <i>PTPRR</i>     | ttgctgaagtgggatcgtg    | atgctggcttcccactcttc    |
| <i>18s rRNA</i>  | agaaacggctaccacatcca   | caccagacttgcctcca       |

Table S2. Differentially expressed genes between uniform 28.4 Pa and 3.5 Pa with no gradient \*

| <b>Symbol</b> | <b>Description</b>                                                   | <b>Gene ID</b> | <b>Ratio</b> | <b>Adjusted p value</b> |
|---------------|----------------------------------------------------------------------|----------------|--------------|-------------------------|
| PROCR         | protein C receptor, endothelial                                      | 282005         | 2.74         | 0.00027                 |
| EMR3          | egf-like module-containing mucin-like receptor 3                     | 526347         | 2.42         | 0.00106                 |
| ADAMTS1       | ADAM metallopeptidase with thrombospondin type 1 motif, 1            | 512171         | 1.86         | 0.00027                 |
| TOP2A         | topoisomerase (DNA) II alpha 170kDa                                  | 787696         | 1.58         | 0.00041                 |
| PTPRR         | protein tyrosine phosphatase, receptor type, R                       | 536337         | 1.51         | 0.00133                 |
| AQP1          | aquaporin 1 (Colton blood group)                                     | 282653         | 1.47         | 0.00049                 |
| LPIN1         | lipin 1                                                              | 537224         | 1.45         | 0.00109                 |
| NCEH1         | neutral cholesterol ester hydrolase 1                                | 534212         | 1.42         | 0.00089                 |
| ESPL1         | extra spindle pole bodies homolog 1 (S. cerevisiae)                  | 506740         | 1.41         | 0.00041                 |
| NR4A1         | nuclear receptor subfamily 4, group A, member 1                      | 528390         | 1.41         | 0.00083                 |
| SHCBP1        | SHC SH2-domain binding protein 1                                     | 523367         | 1.38         | 0.00107                 |
| KIF20A        | kinesin family member 20A                                            | 527854         | 1.37         | 0.00054                 |
| ASPM          | asp (abnormal spindle) homolog, microcephaly associated (Drosophila) | 534849         | 1.36         | 0.00086                 |
| LOC538402     | similar to Protein FAM81A                                            | 538402         | 1.34         | 0.00238                 |
| CASC5         | cancer susceptibility candidate 5                                    | 787969         | 1.34         | 0.00053                 |
| CDK1          | cyclin-dependent kinase 1                                            | 281061         | 1.30         | 0.00061                 |
| UBE2C         | ubiquitin-conjugating enzyme E2C                                     | 506962         | 1.30         | 0.00075                 |
| MALL          | mal, T-cell differentiation protein-like                             | 512289         | 1.30         | 0.00164                 |
| RAD51AP1      | RAD51 associated protein 1                                           | 615937         | 1.29         | 0.00123                 |
| ANLN          | anillin, actin binding protein                                       | 518274         | 1.28         | 0.00054                 |
| CENPN         | centromere protein N                                                 | 513551         | 1.27         | 0.00084                 |
| OIP5          | Opa interacting protein 5                                            | 511100         | 1.27         | 0.00098                 |
| MIR221        | microRNA mir-221                                                     | 790983         | 1.26         | 0.00293                 |
| PODXL         | podocalyxin-like                                                     | 616366         | 1.25         | 0.00133                 |
| E2F8          | E2F transcription factor 8                                           | 786629         | 1.25         | 0.00047                 |
| CCNB1         | cyclin B1                                                            | 327679         | 1.25         | 0.00142                 |
| DCK           | deoxycytidine kinase                                                 | 530642         | 1.24         | 0.00088                 |

|              |                                                                                            |           |      |         |
|--------------|--------------------------------------------------------------------------------------------|-----------|------|---------|
| ADAMTS6      | ADAM metallopeptidase with thrombospondin type 1 motif, 6                                  | 540722    | 1.24 | 0.00285 |
| HJURP        | Holliday junction recognition protein                                                      | 617456    | 1.23 | 0.00093 |
| ITGA6        | integrin, alpha 6                                                                          | 535043    | 1.23 | 0.00041 |
| HSPA12A      | heat shock 70kDa protein 12A                                                               | 540050    | 1.22 | 0.00054 |
| AURKB        | aurora kinase B                                                                            | 360192    | 1.21 | 0.00076 |
| ERCC6L       | excision repair cross-complementing rodent repair deficiency, complementation group 6-like | 782916    | 1.21 | 0.00107 |
| LOC100335204 | mCG141481-like                                                                             | 100335204 | 1.21 | 0.00521 |
| AKAP12       | A kinase (PRKA) anchor protein 12                                                          | 513774    | 1.20 | 0.00050 |
| FOS          | FBJ murine osteosarcoma viral oncogene homolog                                             | 280795    | 1.20 | 0.00535 |
| SPRY2        | sprouty homolog 2 (Drosophila)                                                             | 539090    | 1.20 | 0.00161 |
| FANCI        | Fanconi anemia, complementation group I                                                    | 522442    | 1.20 | 0.00072 |
| AURKA        | aurora kinase A                                                                            | 504437    | 1.19 | 0.00490 |
| NUSAP1       | nucleolar and spindle associated protein 1                                                 | 616028    | 1.19 | 0.00121 |
| KLF4         | Kruppel-like factor 4 (gut)                                                                | 520842    | 1.19 | 0.00106 |
| LOC540455    | hypothetical protein LOC540455                                                             | 540455    | 1.19 | 0.00119 |
| PAF          | KIAA0101 protein                                                                           | 540737    | 1.18 | 0.00397 |
| BUB1         | budding uninhibited by benzimidazoles 1 homolog (yeast)                                    | 514777    | 1.17 | 0.00059 |
| NSL1         | NSL1, MIND kinetochore complex component, homolog (S. cerevisiae)                          | 506867    | 1.17 | 0.00093 |
| SMC2         | structural maintenance of chromosomes 2                                                    | 539217    | 1.16 | 0.00076 |
| SPAG5        | sperm associated antigen 5                                                                 | 504585    | 1.15 | 0.00072 |
| CCRN4L       | CCR4 carbon catabolite repression 4-like (S. cerevisiae)                                   | 540641    | 1.15 | 0.00047 |
| SPP1         | secreted phosphoprotein 1                                                                  | 281499    | 1.15 | 0.00374 |
| FBXO5        | F-box protein 5                                                                            | 515080    | 1.14 | 0.00098 |
| KIF2C        | kinesin family member 2C                                                                   | 533161    | 1.14 | 0.00173 |
| ASF1B        | ASF1 anti-silencing function 1 homolog B (S. cerevisiae)                                   | 510538    | 1.14 | 0.00041 |
| CDCA8        | cell division cycle associated 8                                                           | 508022    | 1.14 | 0.00088 |
| NPPC         | natriuretic peptide C                                                                      | 281356    | 1.13 | 0.00137 |

|           |                                                                                 |           |      |         |
|-----------|---------------------------------------------------------------------------------|-----------|------|---------|
| MRAS      | muscle RAS oncogene homolog                                                     | 540803    | 1.13 | 0.00075 |
| UHRF1     | ubiquitin-like with PHD and ring finger domains 1                               | 530411    | 1.12 | 0.00107 |
| NCAPG2    | non-SMC condensin II complex, subunit G2                                        | 516644    | 1.10 | 0.00148 |
| PTPRB     | protein tyrosine phosphatase, receptor type, B                                  | 505696    | 1.09 | 0.00041 |
| BIRC5     | baculoviral IAP repeat containing 5                                             | 414925    | 1.08 | 0.00110 |
| KNTC1     | kinetochore associated 1                                                        | 506353    | 1.08 | 0.00238 |
| CKAP2     | cytoskeleton associated protein 2                                               | 515249    | 1.08 | 0.01720 |
| BUB1B     | budding uninhibited by benzimidazoles 1 homolog<br>beta (yeast)                 | 537027    | 1.08 | 0.00223 |
| LMO7      | LIM domain 7                                                                    | 539359    | 1.07 | 0.02176 |
| ARF4      | ADP-ribosylation factor 4                                                       | 282601    | 1.07 | 0.00103 |
| CKS2      | CDC28 protein kinase regulatory subunit 2                                       | 767985    | 1.06 | 0.00047 |
| ATAD5     | ATPase family, AAA domain containing 5                                          | 513059    | 1.06 | 0.00231 |
| PRC1      | protein regulator of cytokinesis 1                                              | 767818    | 1.06 | 0.00146 |
| NCAPH     | non-SMC condensin I complex, subunit H                                          | 504477    | 1.05 | 0.00075 |
| SPC24     | SPC24, NDC80 kinetochore complex component,<br>homolog ( <i>S. cerevisiae</i> ) | 509117    | 1.05 | 0.00141 |
| TSC22D3   | TSC22 domain family, member 3                                                   | 100125309 | 1.04 | 0.00164 |
| TFRC      | transferrin receptor (p90, CD71)                                                | 504698    | 1.04 | 0.00437 |
| TCF19     | transcription factor 19                                                         | 514216    | 1.04 | 0.00301 |
| KIF23     | kinesin family member 23                                                        | 515748    | 1.03 | 0.00093 |
| TIMP3     | TIMP metalloproteinase inhibitor 3                                              | 282094    | 1.03 | 0.00235 |
| SGOL1     | shugoshin-like 1 ( <i>S. pombe</i> )                                            | 614056    | 1.02 | 0.00161 |
| KIFC1     | kinesin family member C1                                                        | 510995    | 1.02 | 0.00734 |
| EPB42     | erythrocyte membrane protein band 4.2                                           | 281754    | 1.02 | 0.00230 |
| KIF22     | kinesin family member 22                                                        | 506294    | 1.02 | 0.00216 |
| RRM2      | ribonucleotide reductase M2                                                     | 508167    | 1.02 | 0.00449 |
| CKAP2L    | cytoskeleton associated protein 2-like                                          | 507498    | 1.01 | 0.00047 |
| CENPF     | centromere protein F, 350/400kDa (mitosin)                                      | 533089    | 1.01 | 0.00131 |
| SKA3      | spindle and kinetochore associated complex subunit<br>3                         | 509921    | 1.01 | 0.00058 |
| LOC520939 | similar to Krueppel-like factor 2 ( <i>Lung krueppel</i> -<br>like factor)      | 520939    | 1.01 | 0.00080 |

|           |                                                                            |        |       |         |
|-----------|----------------------------------------------------------------------------|--------|-------|---------|
| DSN1      | DSN1, MIND kinetochore complex component, homolog ( <i>S. cerevisiae</i> ) | 508271 | 1.00  | 0.00107 |
| MYBL2     | v-myb myeloblastosis viral oncogene homolog (avian)-like 2                 | 510420 | 1.00  | 0.00202 |
| CKS1B     | CDC28 protein kinase regulatory subunit 1B                                 | 615827 | 1.00  | 0.00144 |
| TTR       | transthyretin                                                              | 280948 | -2.28 | 0.00041 |
| CLCA3P    | chloride channel accessory 3 (pseudogene)                                  | 281694 | -2.21 | 0.00041 |
| FABP4     | fatty acid binding protein 4, adipocyte                                    | 281759 | -2.21 | 0.00041 |
| SCARA5    | scavenger receptor class A, member 5 (putative)                            | 516087 | -2.19 | 0.00113 |
| CSF2      | colony stimulating factor 2 (granulocyte-macrophage)                       | 281095 | -2.15 | 0.00041 |
| MGC127538 | hypothetical protein MGC127538                                             | 767920 | -2.07 | 0.00109 |
| CXCL5     | chemokine (C-X-C motif) ligand 5                                           | 281735 | -1.92 | 0.01093 |
| GAS2      | growth arrest-specific 2                                                   | 614840 | -1.87 | 0.00135 |
| CCL26     | chemokine (C-C motif) ligand 26                                            | 508387 | -1.81 | 0.00137 |
| IL8       | interleukin 8                                                              | 280828 | -1.77 | 0.00861 |
| FABP5     | fatty acid binding protein 5 (psoriasis-associated)                        | 281760 | -1.70 | 0.00078 |
| NTRK2     | neurotrophic tyrosine kinase, receptor, type 2                             | 505824 | -1.69 | 0.00041 |
| DHRS3     | dehydrogenase/reductase (SDR family) member 3                              | 281482 | -1.68 | 0.00103 |
| HAS2      | hyaluronan synthase 2                                                      | 281220 | -1.68 | 0.01012 |
| RTP4      | receptor (chemosensory) transporter protein 4                              | 532442 | -1.66 | 0.00076 |
| FBXO32    | F-box protein 32                                                           | 513776 | -1.65 | 0.00047 |
| LOC539374 | similar to Family with sequence similarity 43, member A                    | 539374 | -1.64 | 0.00041 |
| NR2F1     | nuclear receptor subfamily 2, group F, member 1                            | 327684 | -1.54 | 0.00041 |
| ARHGEF11  | Rho guanine nucleotide exchange factor (GEF) 11                            | 511220 | -1.53 | 0.00288 |
| MYLIP     | myosin regulatory light chain interacting protein                          | 541070 | -1.49 | 0.00041 |
| CSF1      | colony stimulating factor 1 (macrophage)                                   | 281094 | -1.48 | 0.00093 |
| SEPP1     | selenoprotein P, plasma, 1                                                 | 282066 | -1.46 | 0.00041 |
| RPRM      | reprimin, TP53 dependent G2 arrest mediator candidate                      | 614739 | -1.43 | 0.00041 |
| ADM       | adrenomedullin                                                             | 280713 | -1.41 | 0.00027 |
| CCL5      | chemokine (C-C motif) ligand 5                                             | 327712 | -1.40 | 0.01443 |

|            |                                                                                    |        |       |         |
|------------|------------------------------------------------------------------------------------|--------|-------|---------|
| CYB561     | cytochrome b-561                                                                   | 317663 | -1.39 | 0.00047 |
| XAF1       | XIAP associated factor 1                                                           | 509740 | -1.37 | 0.00053 |
| LOC507696  | G-protein coupled receptor-associated sorting protein 1-like                       | 507696 | -1.35 | 0.00061 |
| LRIG3      | leucine-rich repeats and immunoglobulin-like domains 3                             | 506574 | -1.35 | 0.00124 |
| MMP1       | matrix metalloproteinase 1 (interstitial collagenase)                              | 281308 | -1.35 | 0.02384 |
| DACT1      | dapper, antagonist of beta-catenin, homolog 1 (Xenopus laevis)                     | 538778 | -1.32 | 0.00718 |
| FST        | follistatin                                                                        | 327681 | -1.32 | 0.00521 |
| PDLIM4     | PDZ and LIM domain 4                                                               | 515410 | -1.30 | 0.00047 |
| TCP11L2    | t-complex 11 (mouse)-like 2                                                        | 541012 | -1.28 | 0.00041 |
| LRRC33     | leucine rich repeat containing 33                                                  | 510688 | -1.28 | 0.00098 |
| PRUNE2     | prune homolog 2 (Drosophila)                                                       | 518308 | -1.25 | 0.00137 |
| RND3       | Rho family GTPase 3                                                                | 540224 | -1.25 | 0.00041 |
| BACE2      | beta-site APP-cleaving enzyme 2                                                    | 534774 | -1.25 | 0.00076 |
| H4         | histone H4                                                                         | 280691 | -1.23 | 0.00086 |
| CD14       | CD14 molecule                                                                      | 281048 | -1.22 | 0.00923 |
| VCAM1      | vascular cell adhesion molecule 1                                                  | 282118 | -1.22 | 0.00103 |
| IFI6       | interferon, alpha-inducible protein 6                                              | 512913 | -1.20 | 0.01195 |
| CXCL2      | chemokine (C-X-C motif) ligand 2                                                   | 613667 | -1.17 | 0.00156 |
| TNFAIP6    | tumor necrosis factor, alpha-induced protein 6                                     | 493710 | -1.17 | 0.03811 |
| SLCO2A1    | solute carrier organic anion transporter family, member 2A1                        | 282468 | -1.17 | 0.00076 |
| NFKBIZ     | nuclear factor of kappa light polypeptide gene enhancer in B-cells inhibitor, zeta | 282713 | -1.15 | 0.00068 |
| CXCL2      | chemokine (C-X-C motif) ligand 2                                                   | 281214 | -1.15 | 0.00917 |
| C10H5orf13 | neuronal protein 3.1                                                               | 1E+08  | -1.15 | 0.00107 |
| TAGLN      | transgelin                                                                         | 513463 | -1.13 | 0.00303 |
| EEF2K      | eukaryotic elongation factor-2 kinase                                              | 521730 | -1.13 | 0.00047 |
| BMP4       | bone morphogenetic protein 4                                                       | 407216 | -1.12 | 0.00663 |
| TMEM37     | transmembrane protein 37                                                           | 613815 | -1.11 | 0.00263 |
| LOC515042  | similar to leucine-rich-domain inter-acting protein                                | 515042 | -1.10 | 0.00050 |

|              |                                                                                                                                                                   |           |       |         |
|--------------|-------------------------------------------------------------------------------------------------------------------------------------------------------------------|-----------|-------|---------|
|              | 1; LeR inter-acting protein 1; LEAP1                                                                                                                              |           |       |         |
| LOC539690    | CD93 molecule-like                                                                                                                                                | 539690    | -1.08 | 0.00075 |
| MEIS1        | Meis homeobox 1                                                                                                                                                   | 613877    | -1.07 | 0.00251 |
| FLRT2        | KIAA0405-like                                                                                                                                                     | 539905    | -1.06 | 0.00088 |
| KIT          | v-kit Hardy-Zuckerman 4 feline sarcoma viral oncogene homolog                                                                                                     | 280832    | -1.05 | 0.00329 |
| LOC539596    | similar to Transforming growth factor-beta induced protein IG-H3 precursor (Beta IG-H3) (Kerato-epithelin) (RGD-containing collagen associated protein) (RGD-CAP) | 539596    | -1.05 | 0.00058 |
| WISP2        | WNT1 inducible signaling pathway protein 2                                                                                                                        | 534658    | -1.03 | 0.00147 |
| TRPM6        | transient receptor potential cation channel, subfamily M, member 6                                                                                                | 527597    | -1.03 | 0.00119 |
| GHR          | growth hormone receptor                                                                                                                                           | 280805    | -1.03 | 0.01498 |
| LOC100295656 | rCG34432-like                                                                                                                                                     | 100295656 | -1.03 | 0.00283 |
| LOC528994    | similar to transmembrane protein 166                                                                                                                              | 528994    | -1.03 | 0.00041 |
| LOC535353    | pleckstrin homology domain-containing family G member 6                                                                                                           | 535353    | -1.02 | 0.00072 |
| PARM1        | prostate androgen-regulated mucin-like protein 1                                                                                                                  | 518368    | -1.02 | 0.00054 |
| GNG11        | guanine nucleotide binding protein (G protein), gamma 11                                                                                                          | 511812    | -1.02 | 0.00059 |
| GCA          | granalcin, EF-hand calcium binding protein                                                                                                                        | 507139    | -1.01 | 0.01947 |
| CCL2         | chemokine (C-C motif) ligand 2                                                                                                                                    | 281043    | -1.01 | 0.00202 |
| BNIP3        | BCL2/adenovirus E1B 19kDa interacting protein 3                                                                                                                   | 615342    | -1.01 | 0.00357 |

\* Significantly enriched or depleted genes were identified between ECs exposed to uniform high WSS of 28.4 Pa and uniform WSS of 3.5 Pa by a linear model approach employing an empirical Bayes method at 5% FDR and more than two-fold change between groups. The ratio of the log<sub>2</sub> fold change along with the adjusted FDR p-value are indicated.
